# Supplementary material for: The Mechanism of Ovule Abortion in Self-Pollinated ‘Hanfu’ Apple Fruits and Related Gene Screening
Source: MDPI journal article supplement (doi:10.3390/plants13070996), 2024-03-30
Supplement: s1 [file s1]

# Table S1

Full-length primer of the top40 DEGs

|         | F                             | R                              |
|---------|-------------------------------|--------------------------------|
| HF17173 | ATGGAGGCTTGTGTGGTG            | CTAAGGGAAAGAAGCCAAAGC          |
| HF19185 | ATGGCAATTTGCCACCAA            | TTAGTTCAA TAA TATTCCTATTATTTTG |
| HF26758 | ATGGTTTATTCTGCCCAGCAC         | TAAAAGTAGGTACTAACTGATTCC       |
| HF25161 | ATGAAGAGAAGCATCGCAGATG        | TTAGAAAAACCCAACAAGTGGAGC       |
| HF07399 | ATGCAATCGGAAACCAATACCG        | CTAAGCCTCACTCCTAGAAGAT         |
| HF33998 | ATGGTAGTTATCGAAGATATAGCAGC    | TCATTCCTCCTTTTTGTCAAGG         |
| HF36826 | ATGGGCAACTACATTTCTTGTAGC      | TCACCTTGAAGAAACAGAACTGC        |
| HF11952 | ATGTCTGATTCTAATTCTACACCTGC    | TTAGTAAGGCAAGCTCTTAGAGC        |
| HF26712 | ATGGCTGAGCGCAATAACTCA         | TTACGCTGCATCATTTGACCC          |
| HF07688 | ATGGCTTCGACTTCCTCTTTG         | TTAATTTCTAGGTGTAGAGTCCACC      |
| HF21043 | ATGAAGACAATTAGTCTCATTGATCTTTC | TCAGTAAATTTTGACAAAGATGCCCTC    |
| HF17061 | ATGTCTCTTAGACCAAGAGCAAC       | TTATTTGCCAGGCGTAAGAGG          |
| HF04575 | ATGGAGGGTTTGATTCTTTTGTG       | TTAGTTACTAGCAACTCGGTG          |
| HF34647 | ATGGATGGGATGGACTTAACAC        | TCAGCCCTTTCTAA TCTTTGACTTG     |
| HF14292 | ATGGAGAGGCCGGAAGGAT           | TCATTTGGCCGGTTTACTACC          |
| HF11455 | ATGAAGATGGAGCAAAATTC AACCTC   | CTAGGTGCAGGTGGAGGGA            |
| HF18911 | ATGGGTGTTGGAA TTCAAACAA TGTG  | TCAGACTCTTACTCTTTCGACT         |
| HF18542 | ATGGCAAGGAACACAAACATGG        | TTAATTAAAGCTA TAGAAGAAGATGGCC  |
| HF18184 | ATGGCTGACTACGAGTTTC           | CTAAGCTTCCAAGAAACCACTC         |
| HF31629 | ATGGCAATGGATAAGGATAACATACTG   | CTAGTTCTCTTTCATCGCGGAT         |
| HF16984 | ATGCATATGAAGAATAACGTGATGATGG  | TCATGCGACCTTTGTAGGTTT          |
| HF29910 | ATGAGGAAACAACCTTCTCGAAATATTC  | TTACAGCTCTTGCTTG GACTG         |
| HF25816 | ATGTCTTCTGTCGATGTTCCAC        | TTATAATGCCACAGGTTCCAC          |
| HF38956 | ATGTCACTCATTTCCCAAGTG         | TTAATTTCTTCAATCTGAATAACCTTC    |
| HF03327 | ATGGAGCAAGAGATGGTGATG         | CTAAGGGTACTTCTTCTTTGTAACAC     |
| HF24033 | ATGGCTCTCAGTCTCTTTGTC         | TCACACAAACAGAAAGGCACAG         |
| HF24031 | ATGGCTCTCAGTCTCTTTGGC         | TTAGCCGGAGATGTCAATGG           |
| HF08868 | ATGGCCCTTCAACACACTTTG         | TCAAACCTTTGGTGGAGGCATC         |
| HF21999 | ATGGGATCCCGAAACAAACGT         | CTAGGCATTATCATTCAGGAATTTT      |
| HF31522 | ATGGGCAGAGCTCCTTGC            | TTATTTGAGGCCAAAGTAGGTTGC       |
| HF10952 | ATGGATCGACCAGGAACG            | TTAAAGCTCTTGCTTGGGCTC          |
| HF42042 | ATGTTTACTTATTTGGCTGCTTGG      | TTAAGAATATTTGTAA TCAGTCTGACGAT |
| HF06112 | ATGGCTCCTCTCATCTTC            | TCAGCATTGCGGTGTTAGTG           |
| HF05640 | ATGGCCTCAACCTCCTCC            | CTAGCTGCTGCCGATTATATC          |
| HF20213 | ATGCAGACGACTACTACAACC         | TTATTTTCTGTCAGACTCCTTTGG       |
| HF24827 | ATGGCAATTCCTTGGTTTTCTCTTGG    | TTAGAATTGTTGGCCGCTGAATGT       |
| HF34501 | ATGCATGTGAAGAAGAATAATGC       | TCATGCGACCTTTGTAGG             |
| HF40595 | ATGATTTCTTCAAGCATTTCTCAG      | TCAAAGTGTAACGAAATTTTAAACA      |

# Table S2

qPCR primer of the top40 DEGs

|         | F                      | R                     |
|---------|------------------------|-----------------------|
| HF17173 | TGGCTCATCTCCCTTACCCT   | AAAGCCACCTCCAAAAGGCA  |
| HF19185 | TCTCGACCCATCCTCACCAT   | TGAAATGGAGATCTCGCCCG  |
| HF26758 | CCACCTCACTACCACACCAC   | AACTCGATGGCCGGAATGTT  |
| HF25161 | CCCAGGTTAACCGGACCATC   | CGCCTGCCCTATAGCAAACCT |
| HF07399 | CAAGCACTAGGTGGGCATCA   | GCTCGAGGGCCCCATAACTTT |
| HF33998 | TGACTGGAGGGTTTGTGTCG   | CCTTCTCGATCTCATCCGCC  |
| HF36826 | CTGATGGTCGACACCCCAAA   | AACTCTTCGTCGGCACTGAG  |
| HF11952 | AGCTACCAAAGCTCAGACC    | GGTGAACCGATTGGAAACCT  |
| HF26712 | TTCGCGCGAGGCAATAAGT    | TAGTTGTGGTTCGCGAGCTT  |
| HF07688 | CTGGTTGTGAGTCTGGACGG   | TGCCTCTTGAAGGACCAGA   |
| HF21043 | TTTCTCTGTTCTGACGGCCC   | CCAGACGTCCGATAAGACCG  |
| HF17061 | AGCAAACCTAGCCAACCTCC   | CGAAGCATCCGGGTAGTCAA  |
| HF04575 | GACCGCTTCGAATCATCGGA   | GCAACTCGGTGACGAAATGG  |
| HF34647 | GCACCTGATTCCACAGTCCA   | TCCCAGTGCTGACGTCTTTC  |
| HF14292 | CCAAAGTTGTTGGCGTTGGT   | CGCTCAGACTCCGTTGCATA  |
| HF11455 | GTTCCGGTTCGGATTACGGT   | ACCTTCCTTGGTGCTTCTCG  |
| HF18911 | GCTGCTGCTTTCCTGCATTT   | GCCACATCTCAGGAGTGCTT  |
| HF18542 | GCAGTGCCGGTCAGAAATTG   | AACGGTCCAAGTGACAGGTG  |
| HF18184 | GGCGTCACCATCAAAACGAC   | GACCGGCACCGACTTGATAA  |
| HF31629 | CTCGGCCCTACAAACCCTCTC  | TCCTTCGCGTCTAATGCTCC  |
| HF16984 | AGGGCGACAACACTACAAGTGG | TCTGATCCAAGTCGGCGTTC  |
| HF29910 | TGCCTTGAGCTTTCTGCTT    | GAGTGCCAGCAGAGTGCTT   |
| HF25816 | GCAGTGAAGGCTGCATCAAC   | CGCTTCTTCTTTTGTTGGCCC |
| HF38956 | CCCTAGACGCCCATGTGTTT   | CTCCTTAGGAACTTGCCCCG  |
| HF03327 | AGCCATTCGACCAGTCACAG   | TCTACCTCCGAGTGCGGTTA  |
| HF24033 | CTCTGCAGACCGTTCCGTT    | TGGCACAGAAGGTTTCTCCG  |
| HF24031 | GCTGAGCTCGTGCTCCTAC    | GTGGGTACCGGAGTGACTTG  |
| HF08868 | TGCAGTCGATGGTTCTTCT    | CTGCAGGGCTCATTTCTGGA  |
| HF21999 | CGCAGAGAGGATTGAGGACC   | TGGCATCGACTCCAAGGTTT  |
| HF31522 | CATGGGCTGGACGATCAGAA   | TACTGGTCCCTGCACTGCTA  |
| HF10952 | ATCACTGGCACCAGTTGAG    | CTTGGCAGGTTACCCCTGAT  |
| HF42042 | GGCGTGTTGCAGAGATTGTC   | GTTTGGTTCGAAAGCCGCAA  |
| HF06112 | GGGCCACAGAGGATGGAAAA   | CTCACTAAGCCCCGATGAGC  |
| HF05640 | CTCTAGTTGACGCCAAGGCT   | TTCCCTGCACGGTTTTGAGA  |
| HF20213 | TGCAACGGCGTTTTATGCAA   | CCTTGGGATCCCCACCTAGA  |
| HF24827 | TAGGTGTGTGAGTGACCCCA   | ATCTGTTGGAAGACGGGCTG  |
| HF34501 | AGGGCGACAACACTACAAGTGG | CGCAAACCTTTGGCACCGTAA |
| HF40595 | GAACTTCCGGGGGAACCATGA  | ATGGGCACATCATCCACCAG  |
